# Supplementary material for: Cytotoxic Anthranilic Acid Derivatives from Deep Sea Sediment-Derived Fungus Penicillium paneum SD-44
Source: Mar Drugs. 2013 Aug 21;11(8):3068–76. doi: 10.3390/md11083068 (PMC3766882; doi:10.3390/md11083068)

# Supplementary Materials

**Figure S1.**  $^1\text{H}$  NMR (500 MHz,  $\text{CDCl}_3$ ) spectrum of compound **1**.

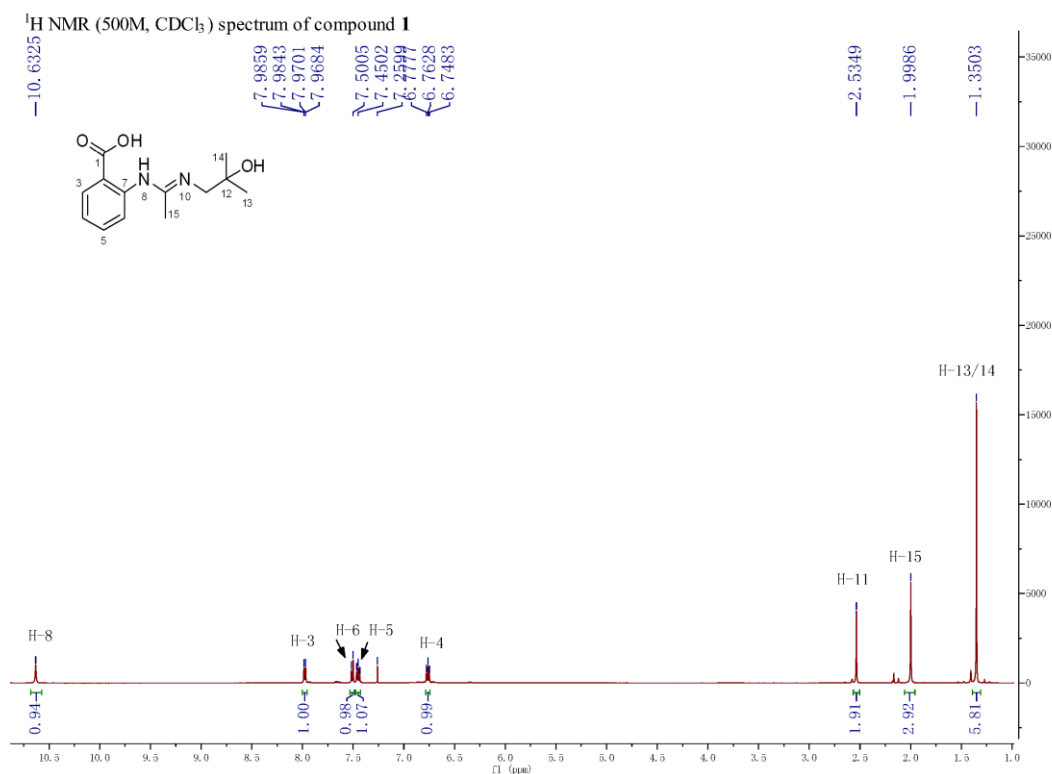

**Figure S2.**  $^{13}\text{C}$  NMR (125 MHz,  $\text{CDCl}_3$ ) spectrum of compound **1**.

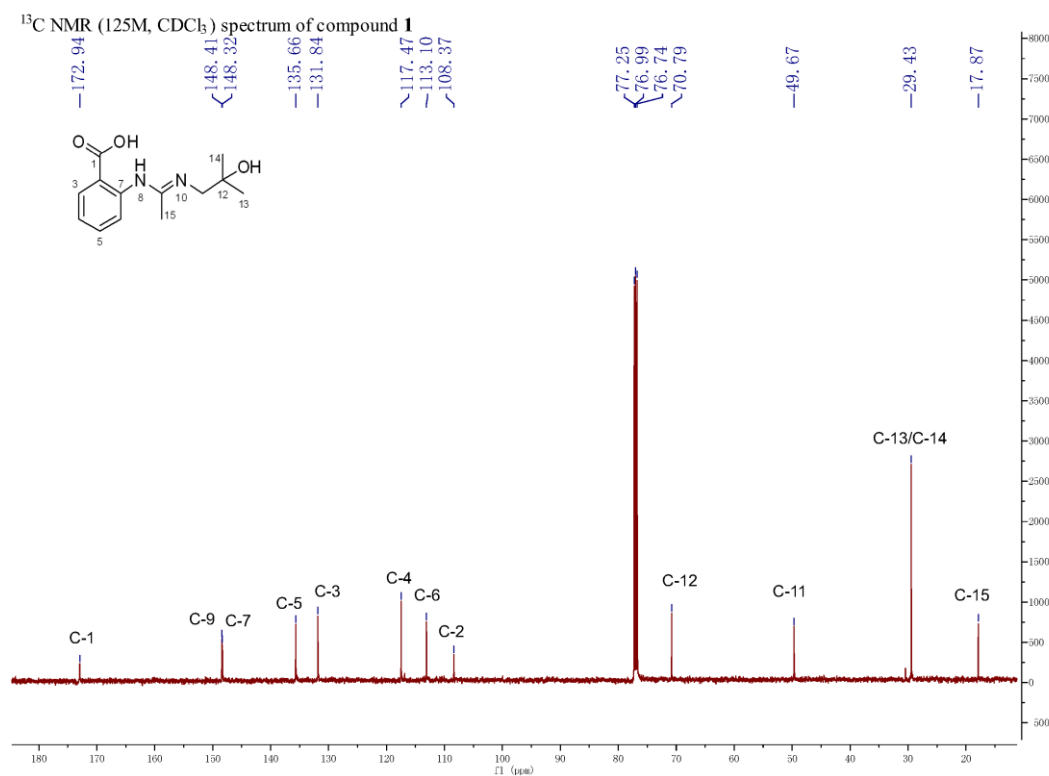

**Figure S3.**  $^1\text{H}$ - $^1\text{H}$  COSY spectrum of compound **1**.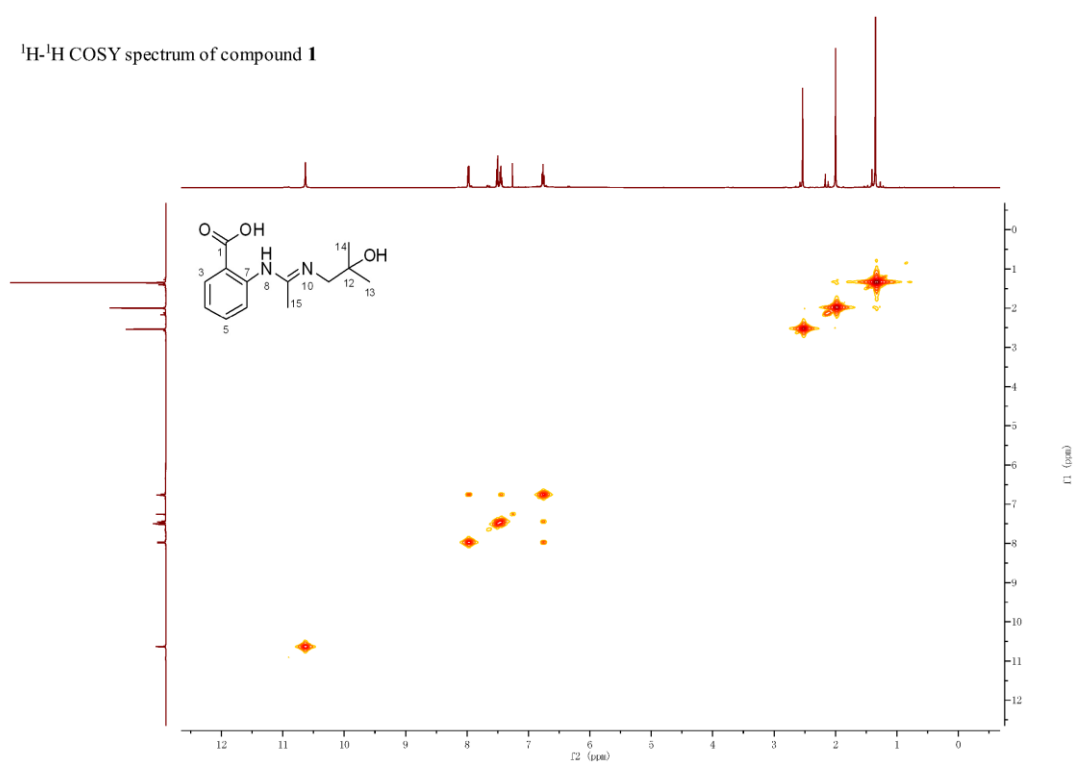**Figure S4.** HSQC spectrum of compound **1**.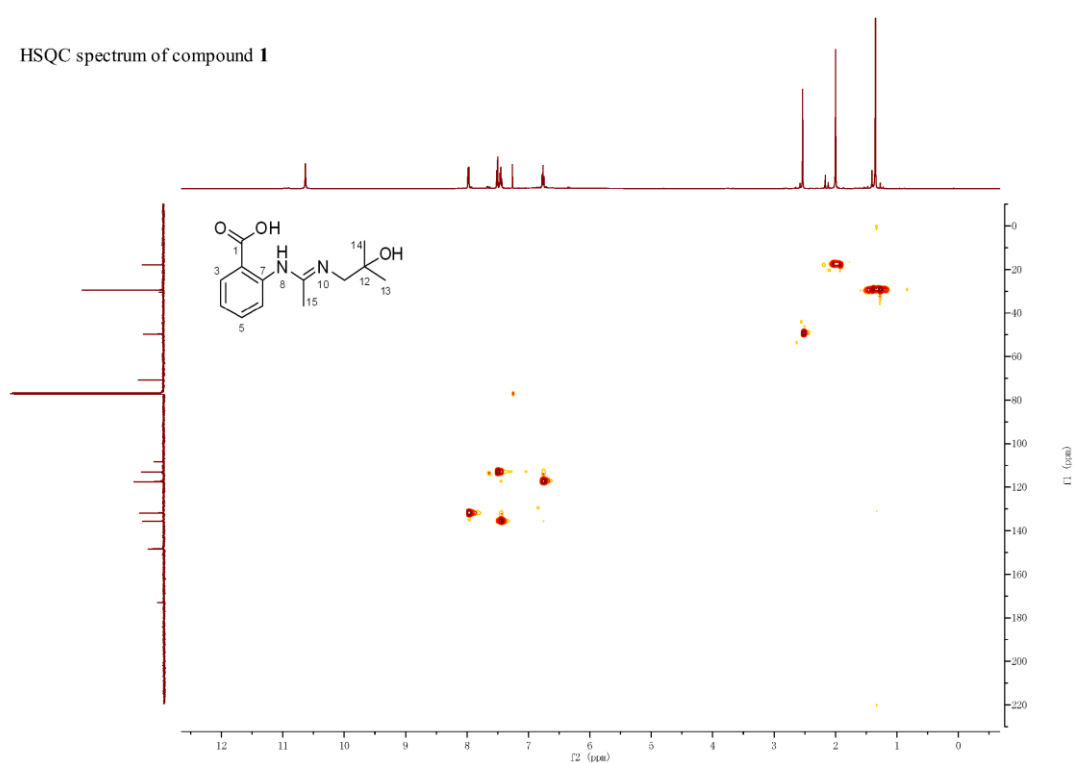

**Figure S5.** HMBC spectrum of compound **1**.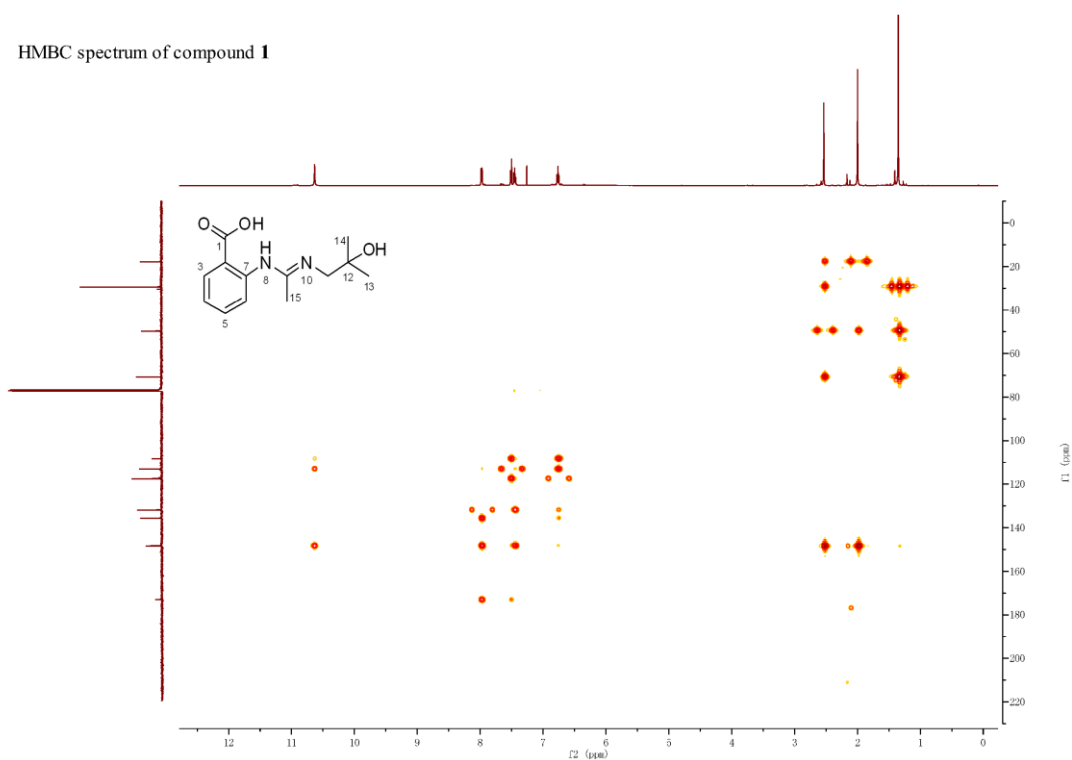**Figure S6.** NOESY spectrum of compound **1**.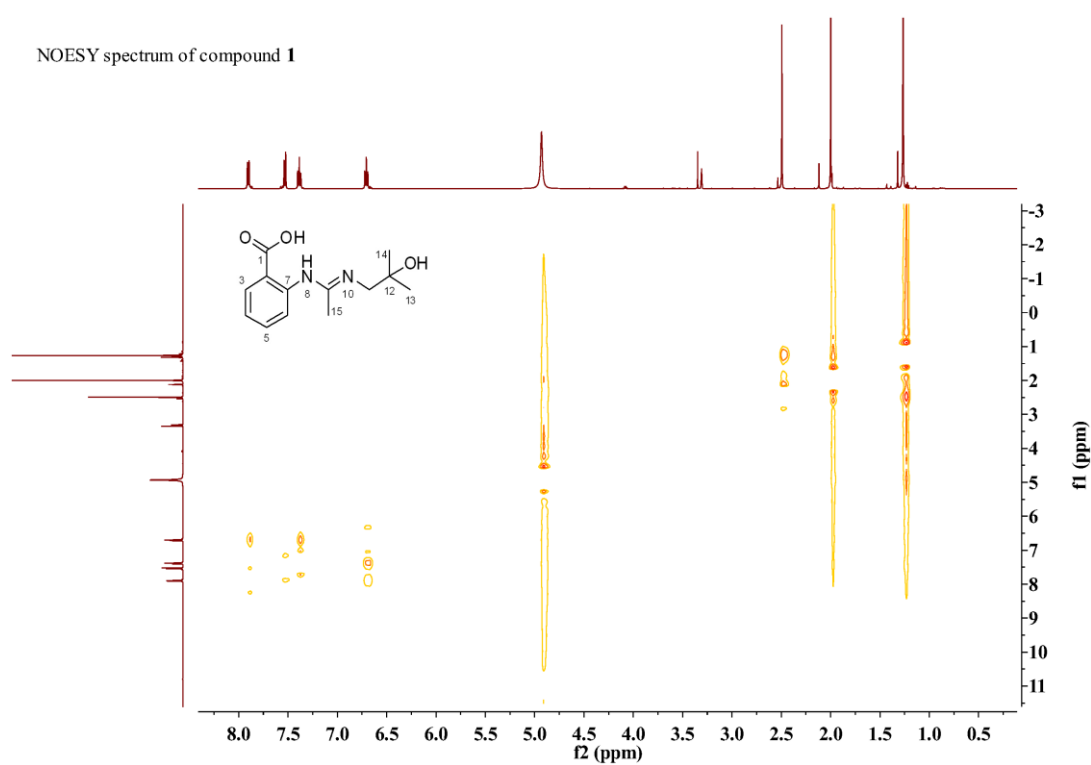

**Figure S7.**  $^1\text{H}$  NMR (500 MHz, methanol- $d_4$ ) spectrum of compound **2**.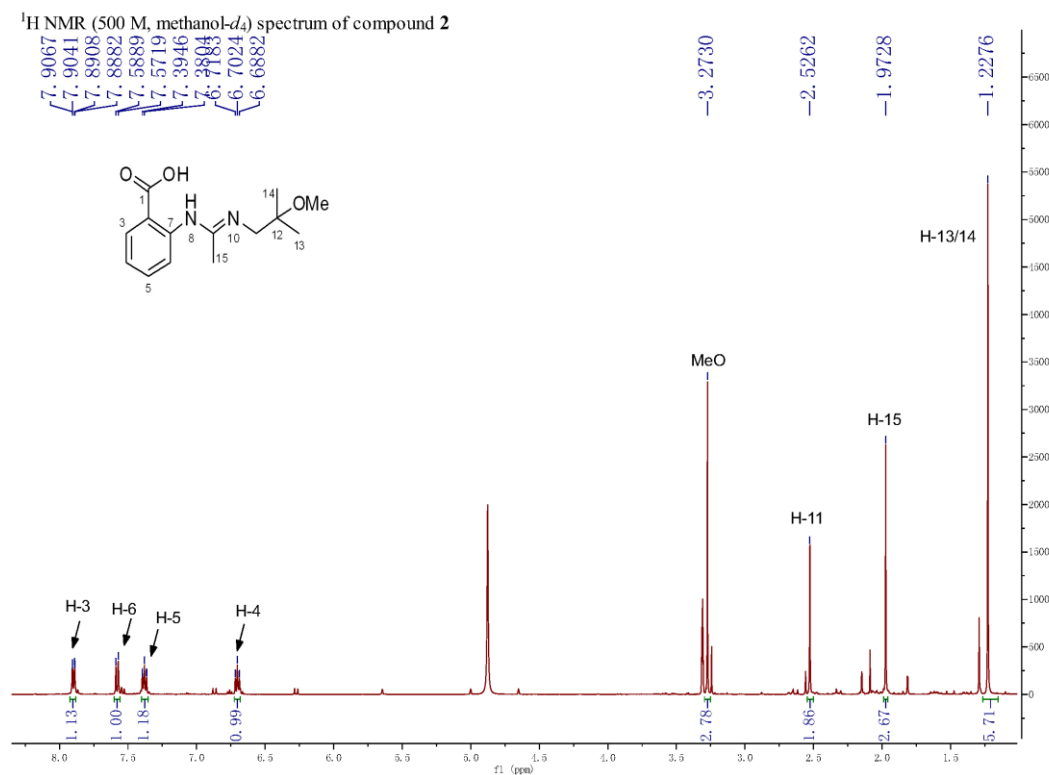**Figure S8.**  $^{13}\text{C}$  NMR (125 MHz, methanol- $d_4$ ) spectrum of compound **2**.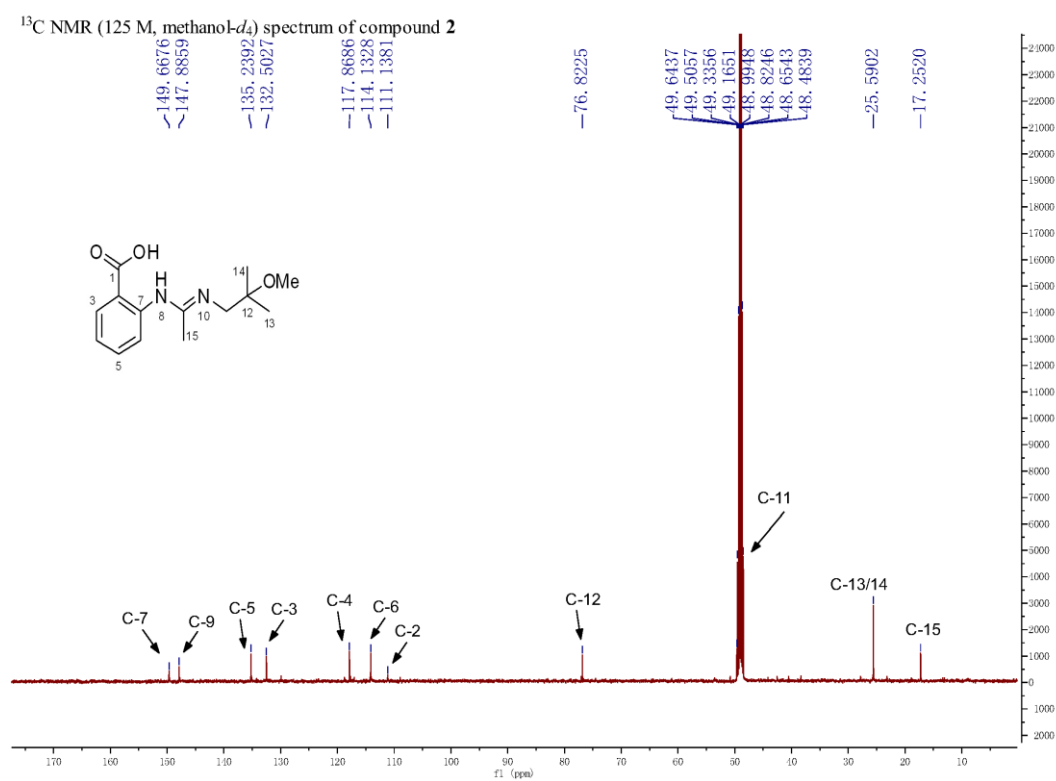

**Figure S9.**  $^1\text{H}$ – $^1\text{H}$  COSY spectrum of compound **2**.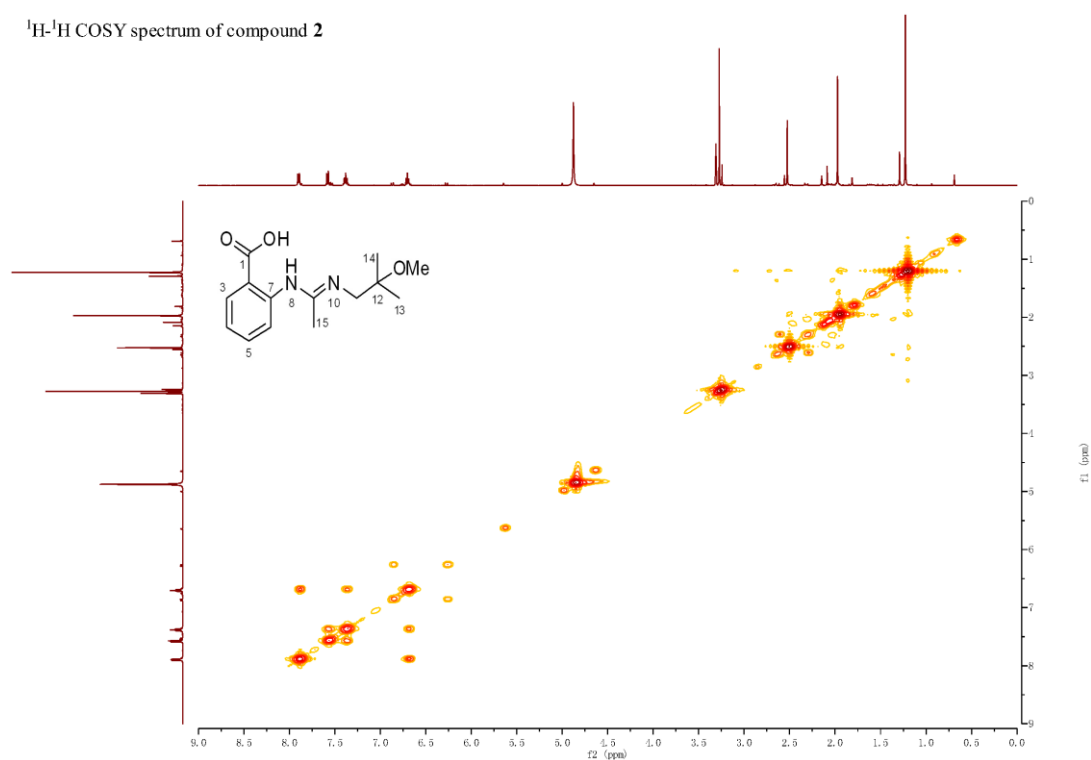**Figure S10.** HSQC spectrum of compound **2**.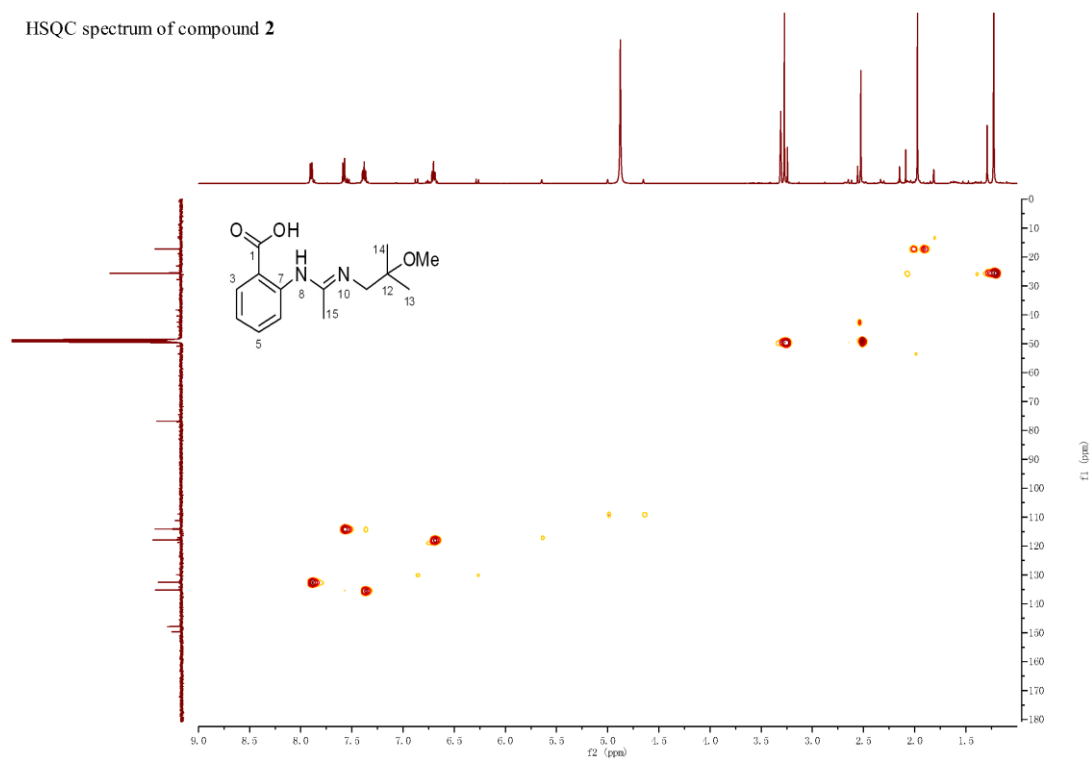

**Figure S11.** HMBC spectrum of compound 2.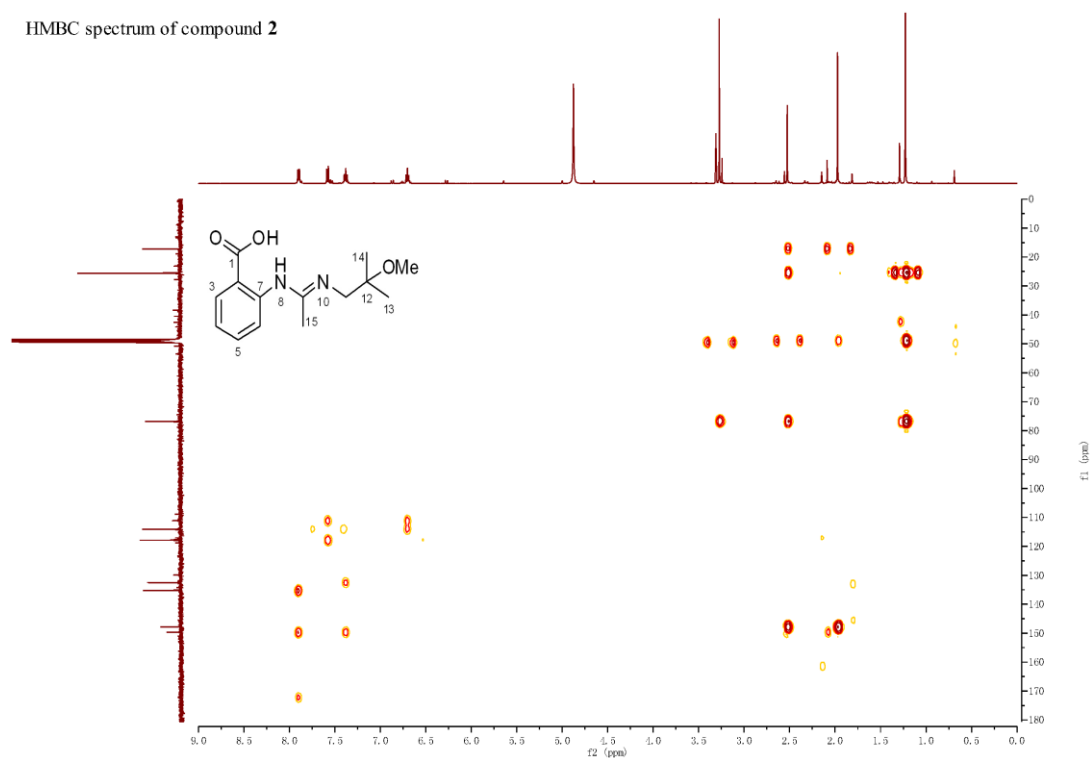**Figure S12.** NOESY spectrum of compound 2.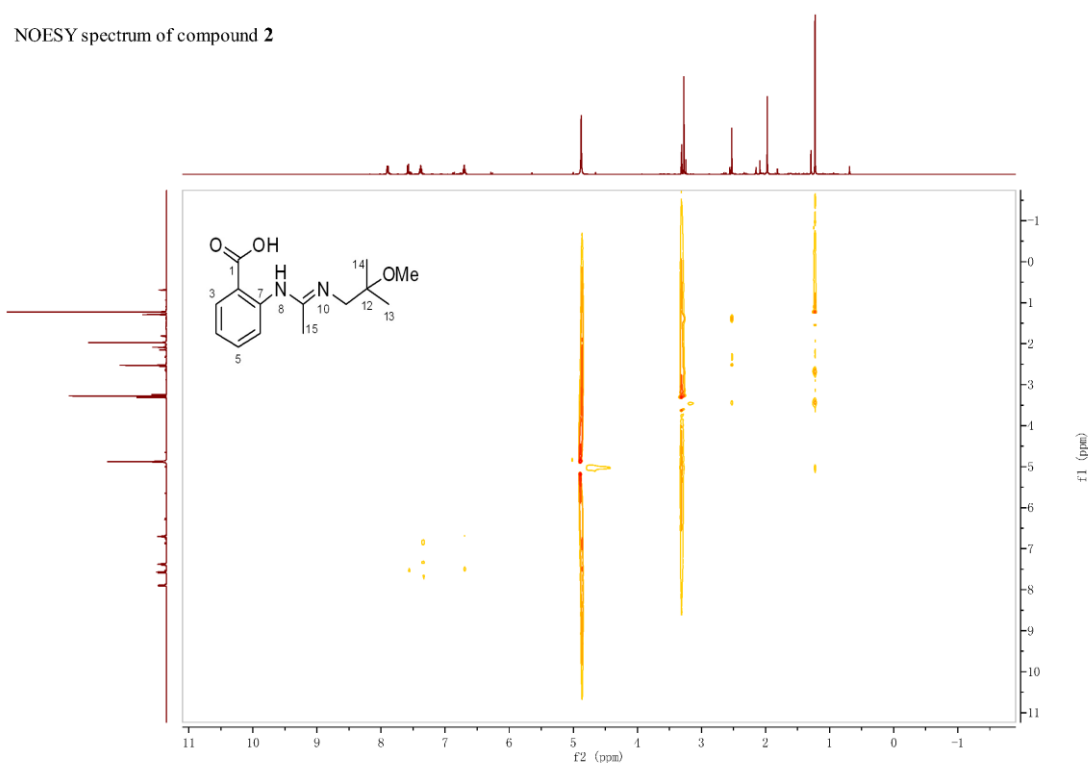

**Figure S13.**  $^1\text{H}$  NMR (500 MHz,  $\text{DMSO}-d_6$ ) spectrum of compound **3**.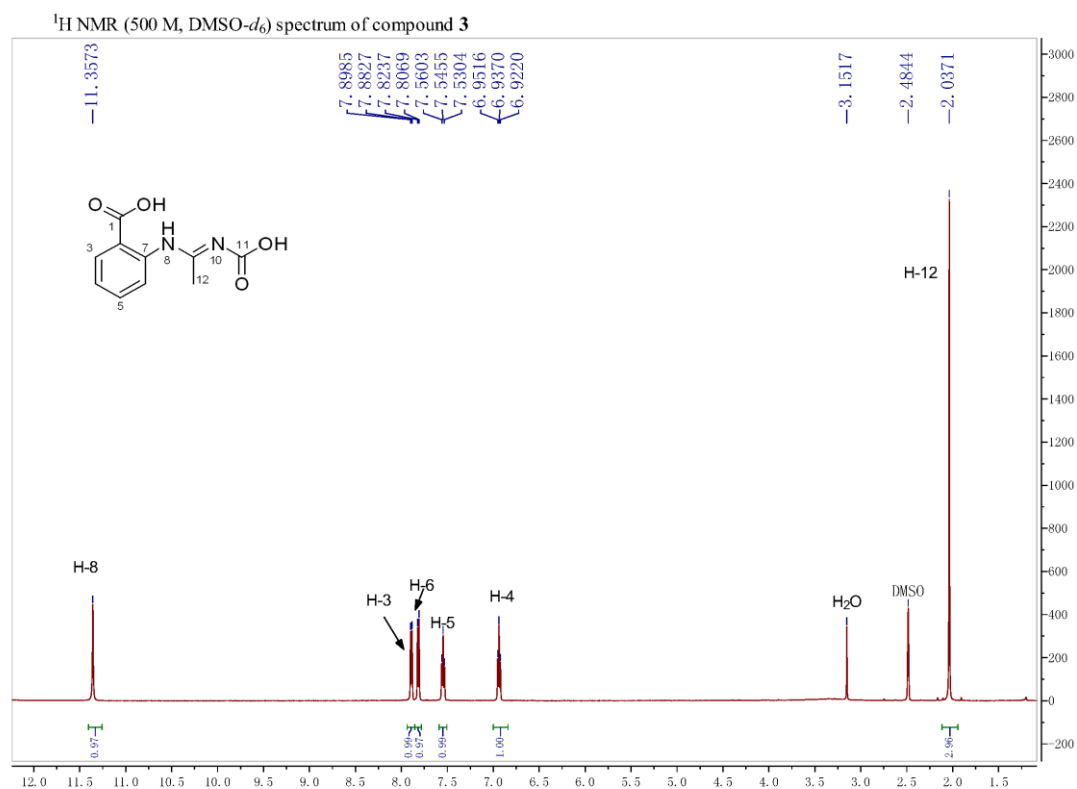**Figure S14.**  $^{13}\text{C}$  NMR (125 MHz,  $\text{DMSO}-d_6$ ) spectrum of compound **3**.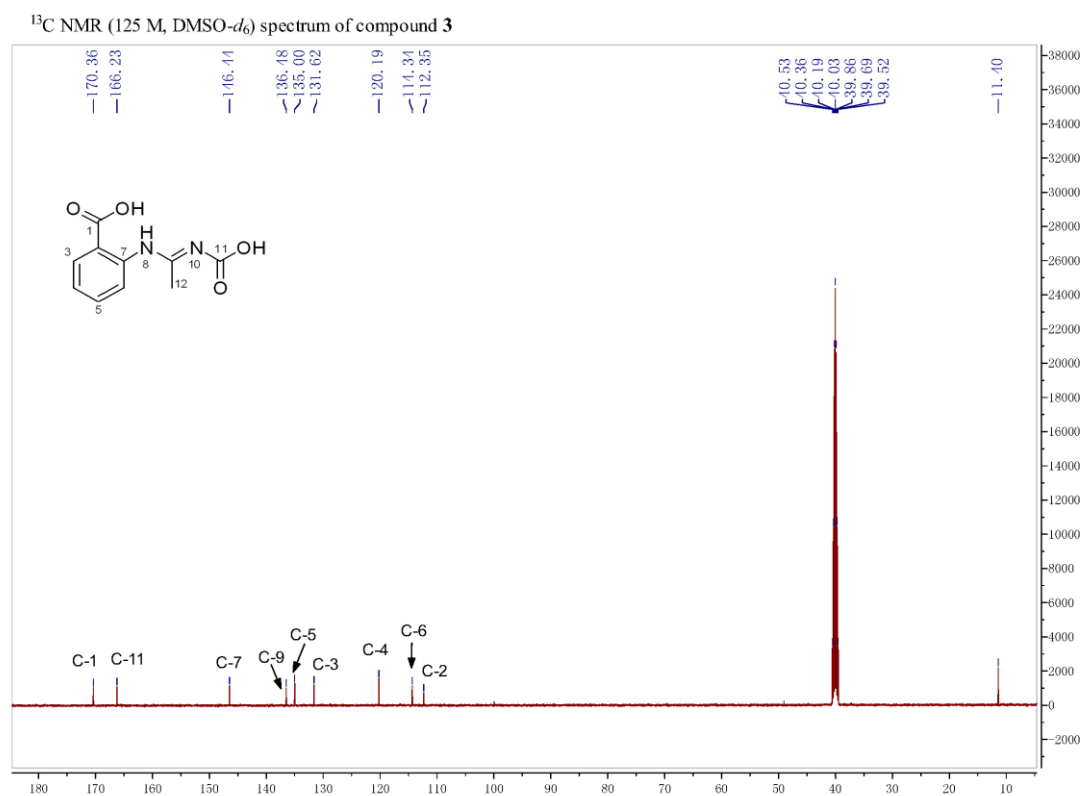

**Figure S15.**  $^1\text{H}$ – $^1\text{H}$  COSY spectrum of compound **3**.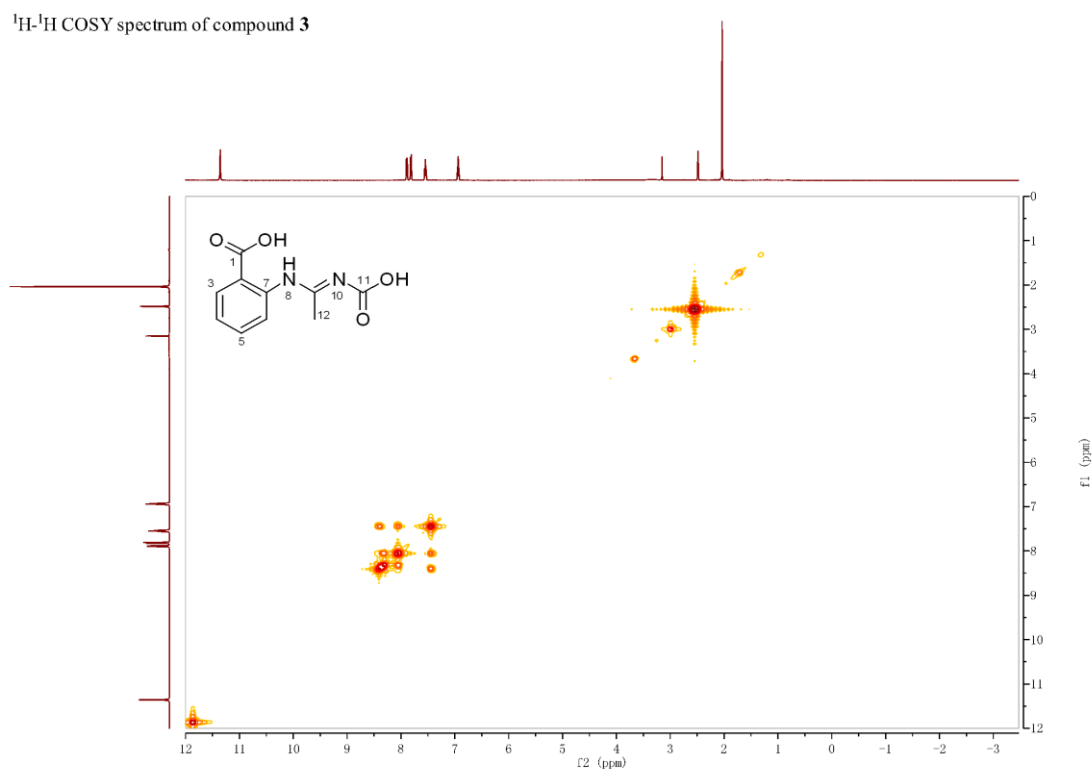**Figure S16.** HSQC spectrum of compound **3**.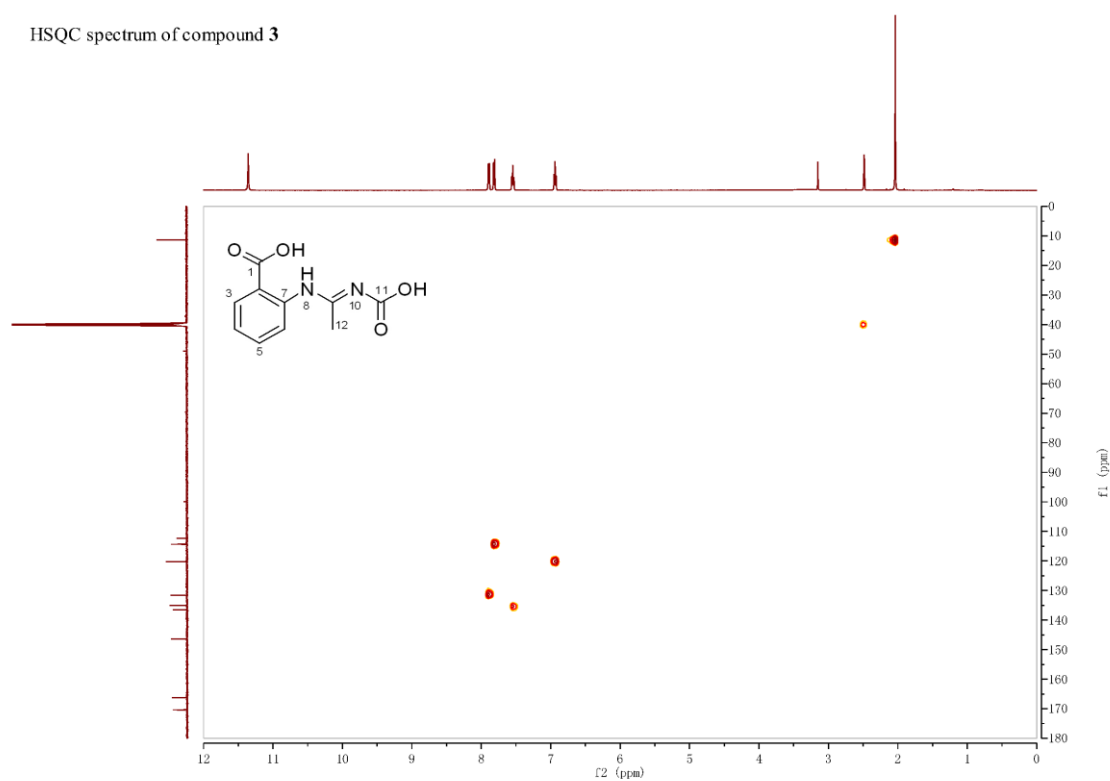

**Figure S17.** HMBC spectrum of compound 3.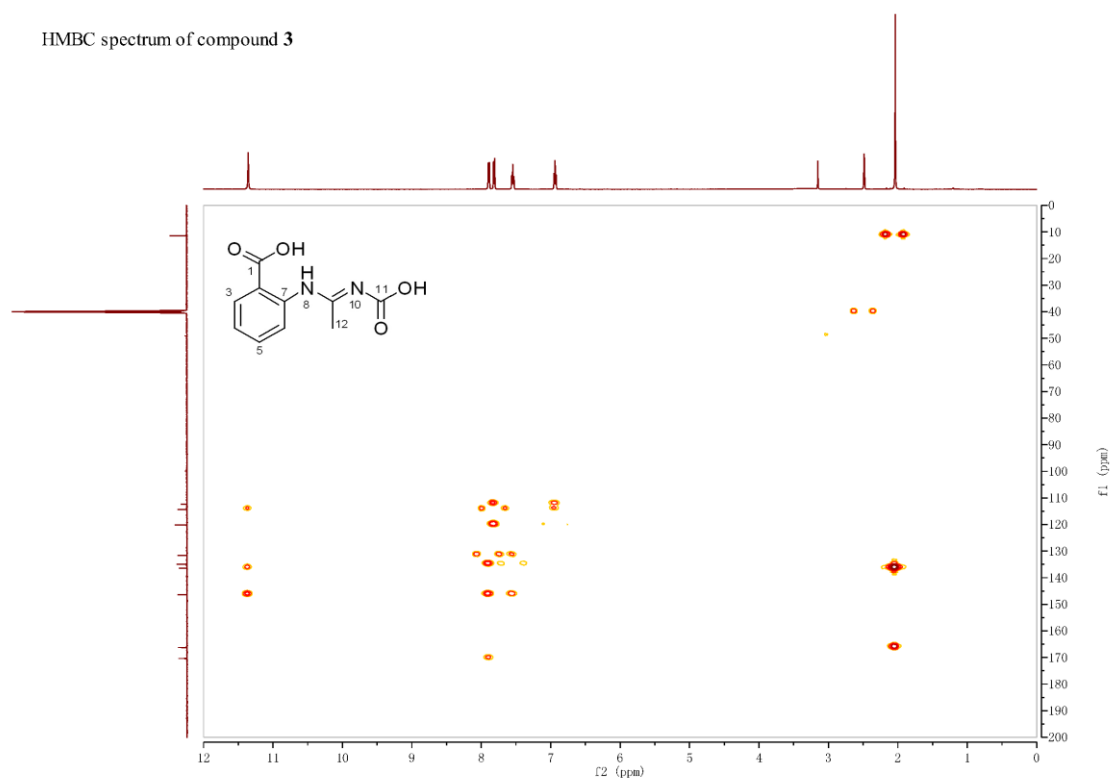**Figure S18.**  $^1\text{H}$  NMR (500 MHz, methanol- $d_4$ ) spectrum of compound 4.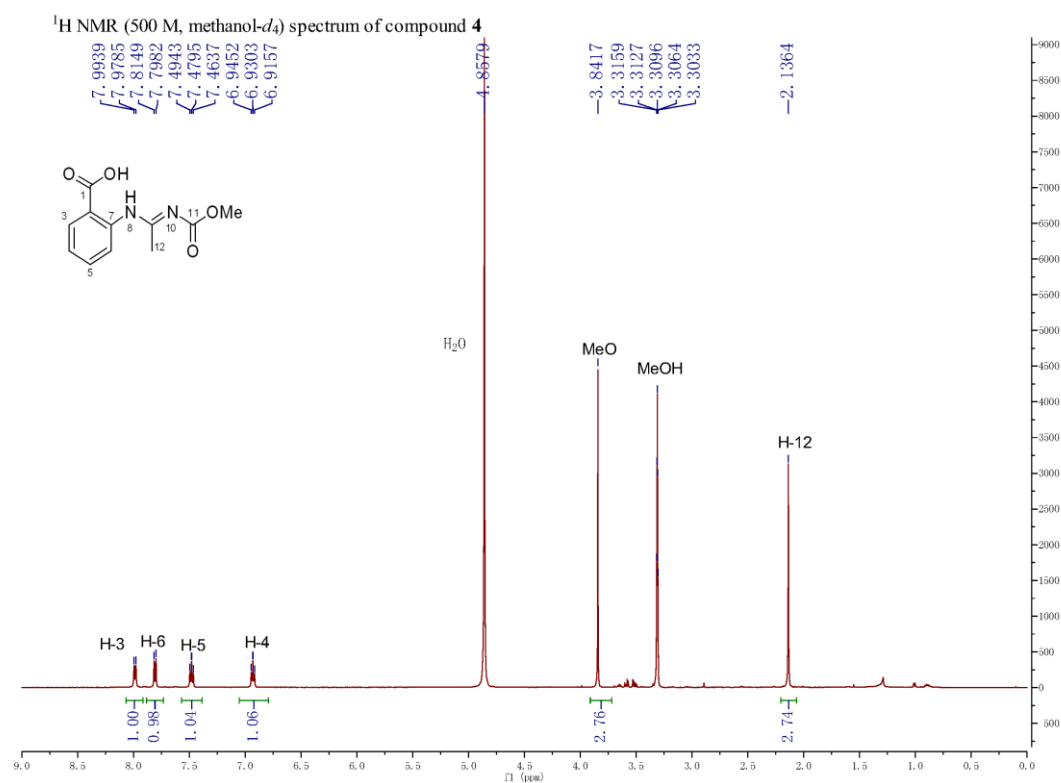

**Figure S19.**  $^{13}\text{C}$  NMR (125 MHz, methanol- $d_4$ ) spectrum of compound **4**.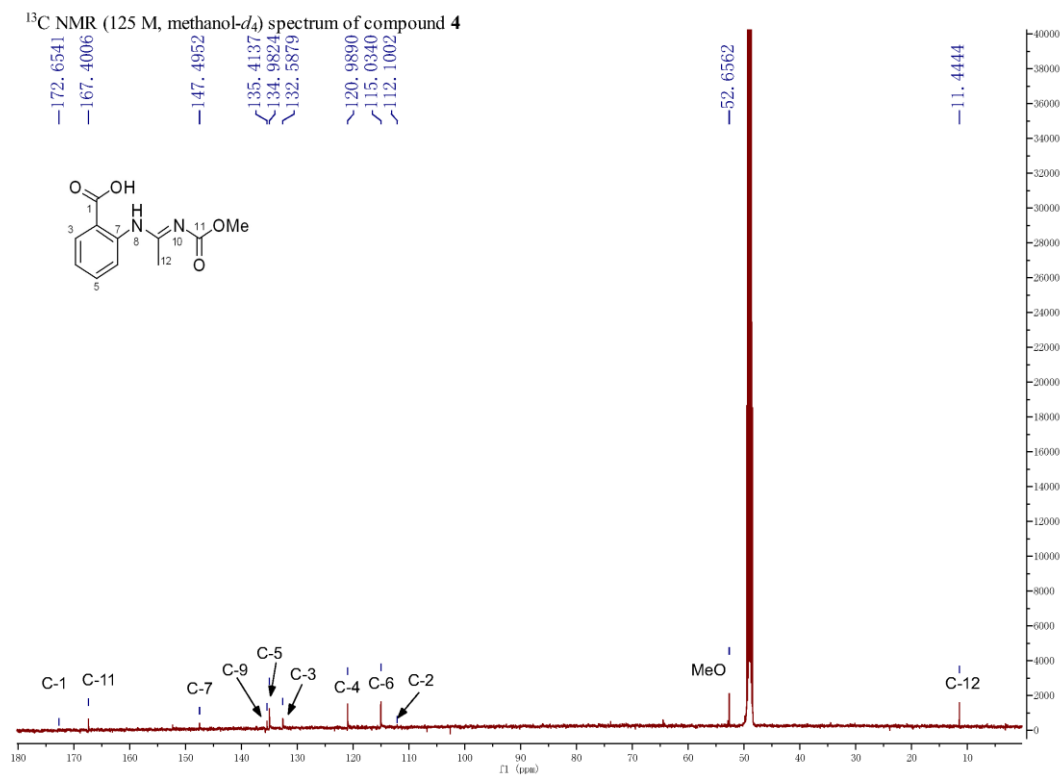**Figure S20.**  $^1\text{H}$ - $^1\text{H}$  COSY spectrum of compound **4**.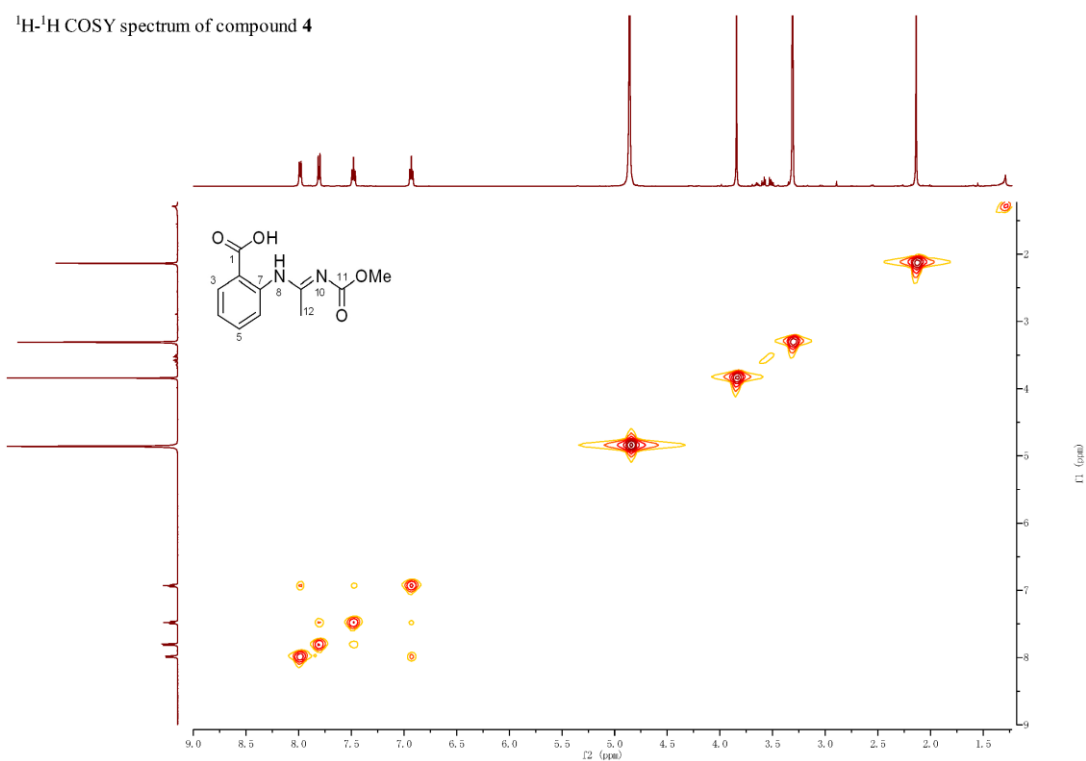

**Figure S21.** HSQC spectrum of compound 4.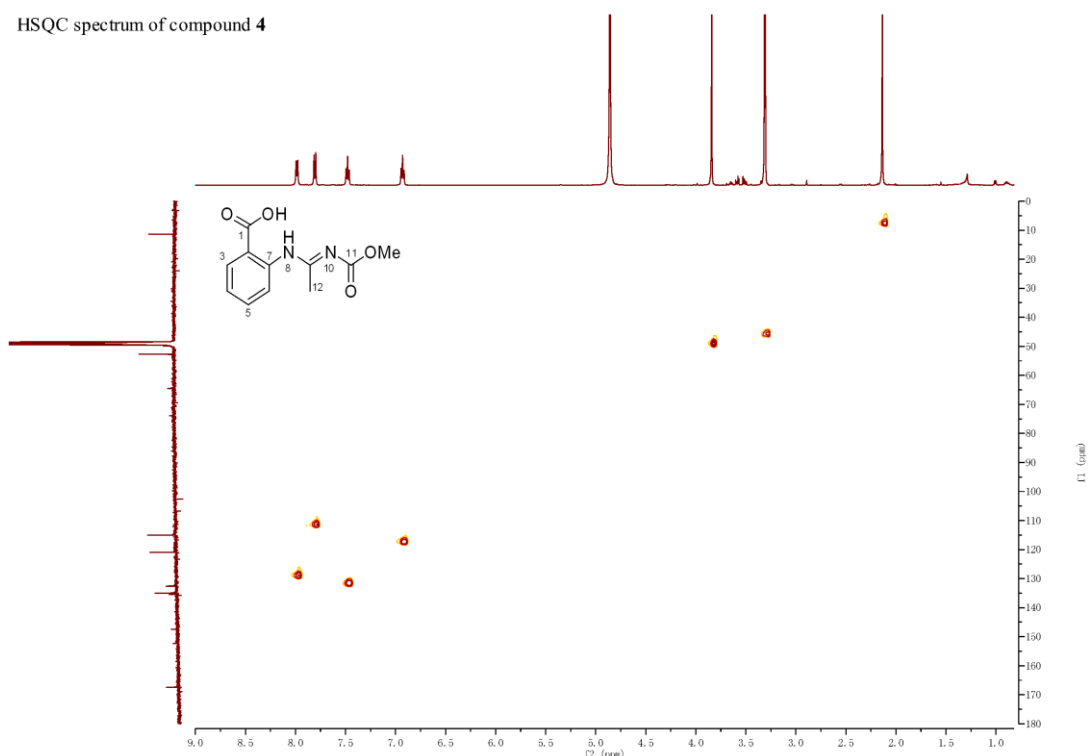**Figure S22.** HMBC spectrum of compound 4.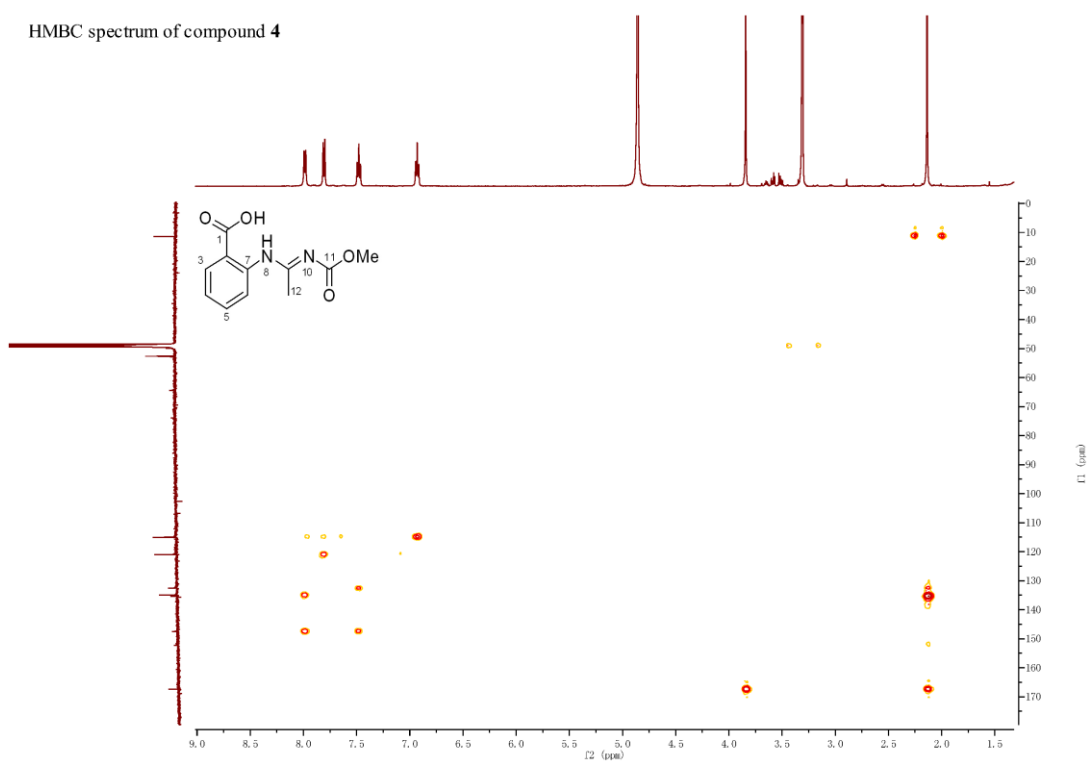

**Figure S23.**  $^1\text{H}$  NMR (500 MHz,  $\text{DMSO}-d_6$ ) spectrum of compound **5**.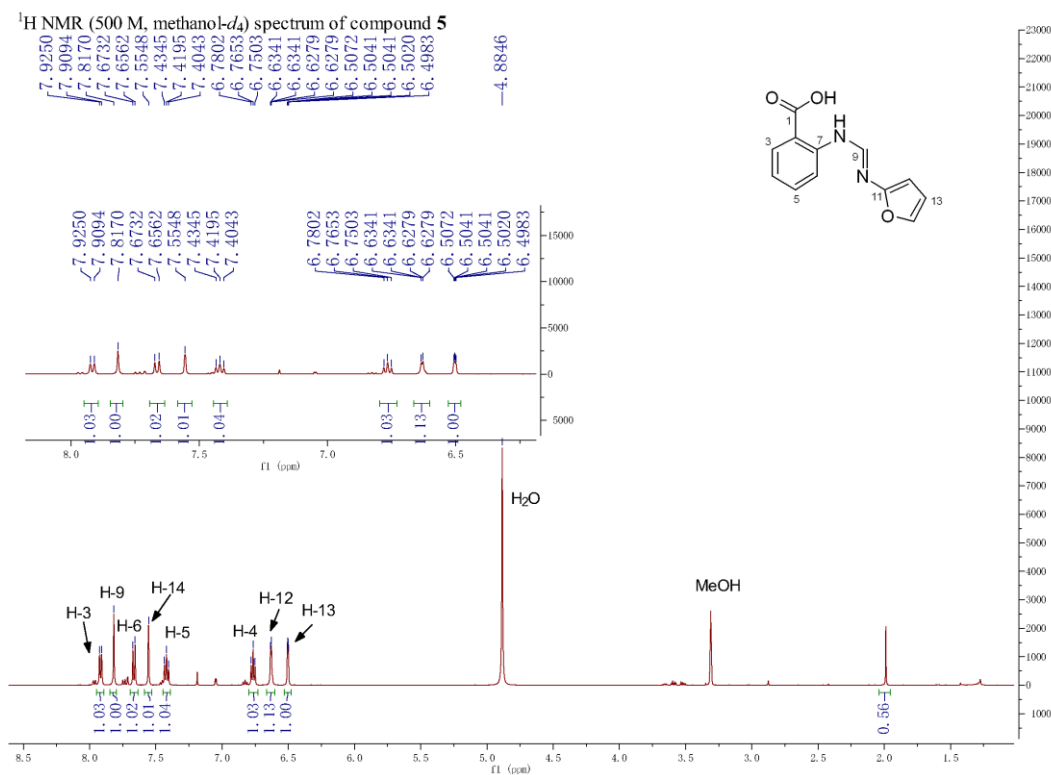**Figure S24.**  $^{13}\text{C}$  NMR (125 MHz,  $\text{DMSO}-d_6$ ) spectrum of compound **5**.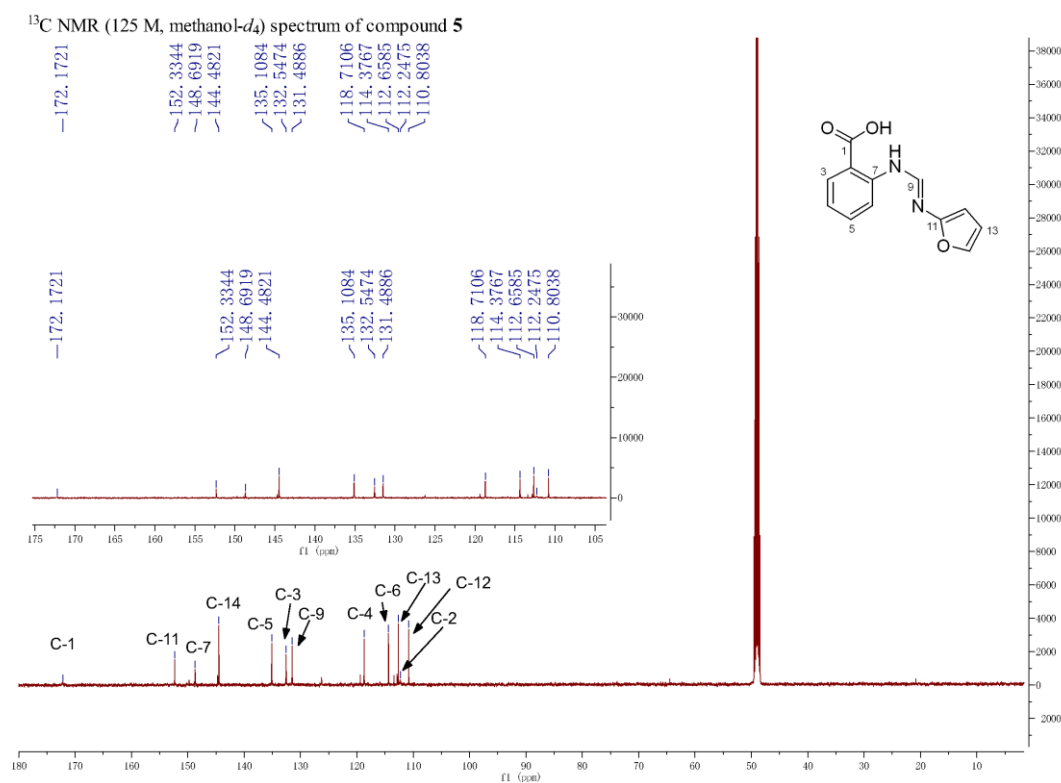

**Figure S25.**  $^1\text{H}$ - $^1\text{H}$  COSY spectrum of compound **5**. $^1\text{H}$ - $^1\text{H}$  COSY spectrum of compound **5**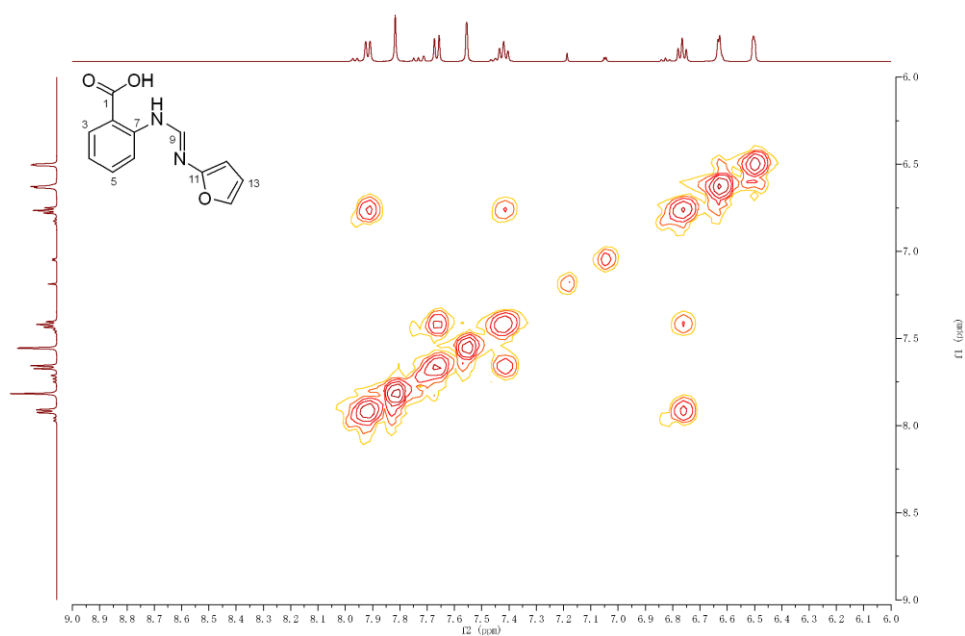**Figure S26.** HSQC spectrum of compound **5**.HSQC spectrum of compound **5**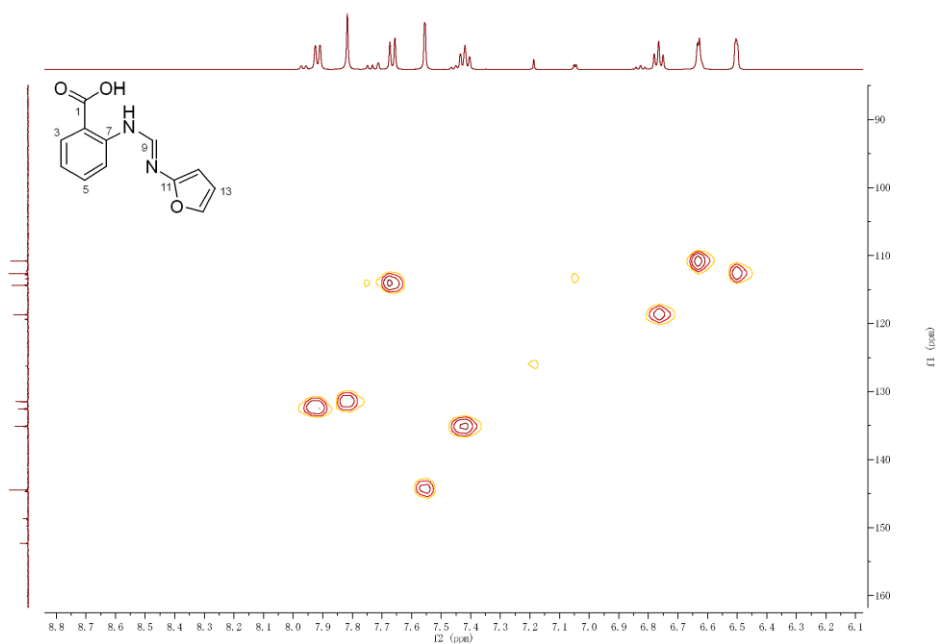

**Figure S27.** HMBC spectrum of compound **5**.HMBC spectrum of compound **5**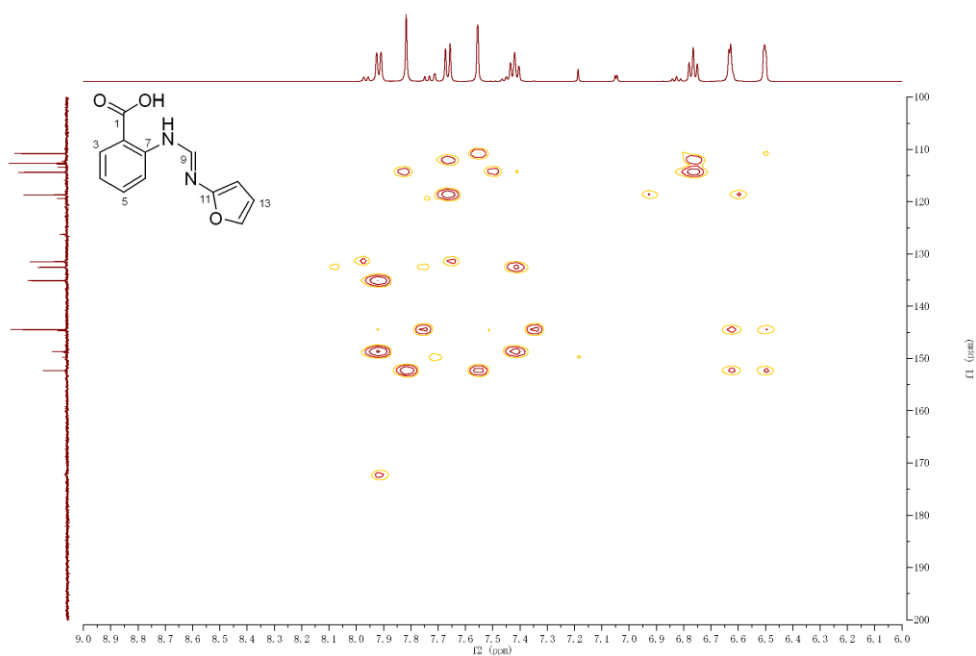**Figure S28.** NOESY spectrum of compound **5**.NOESY spectrum of compound **5**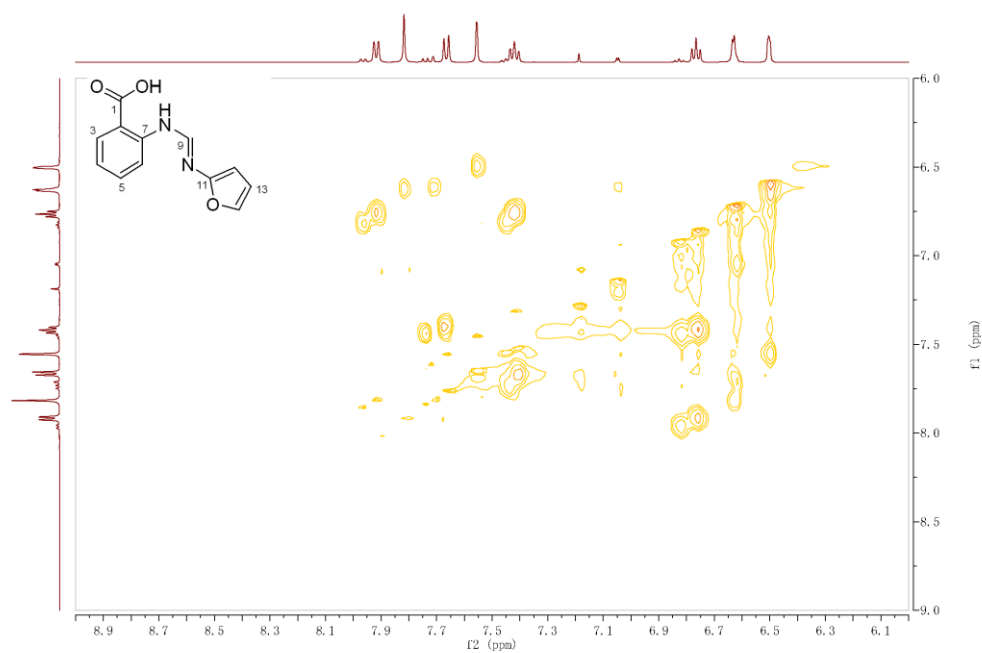

**Figure S29.**  $^1\text{H}$  NMR (500 MHz, methanol- $d_4$ ) spectrum of compound **6**.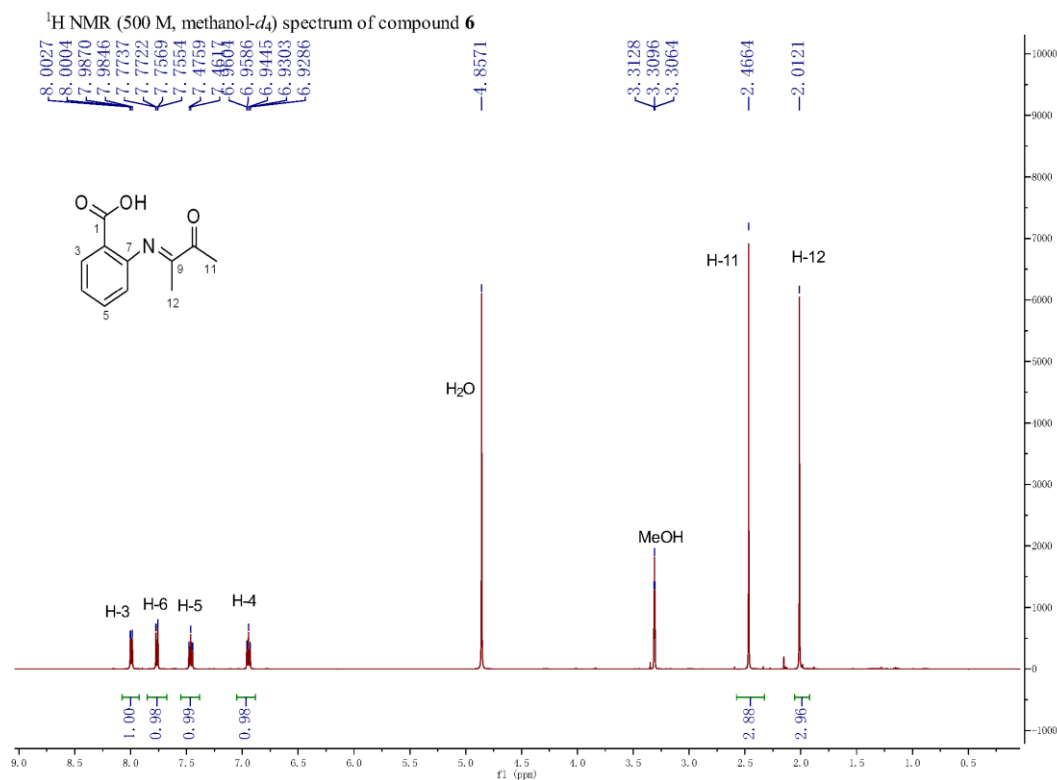**Figure S30.**  $^{13}\text{C}$  NMR (125 MHz, methanol- $d_4$ ) spectrum of compound **6**.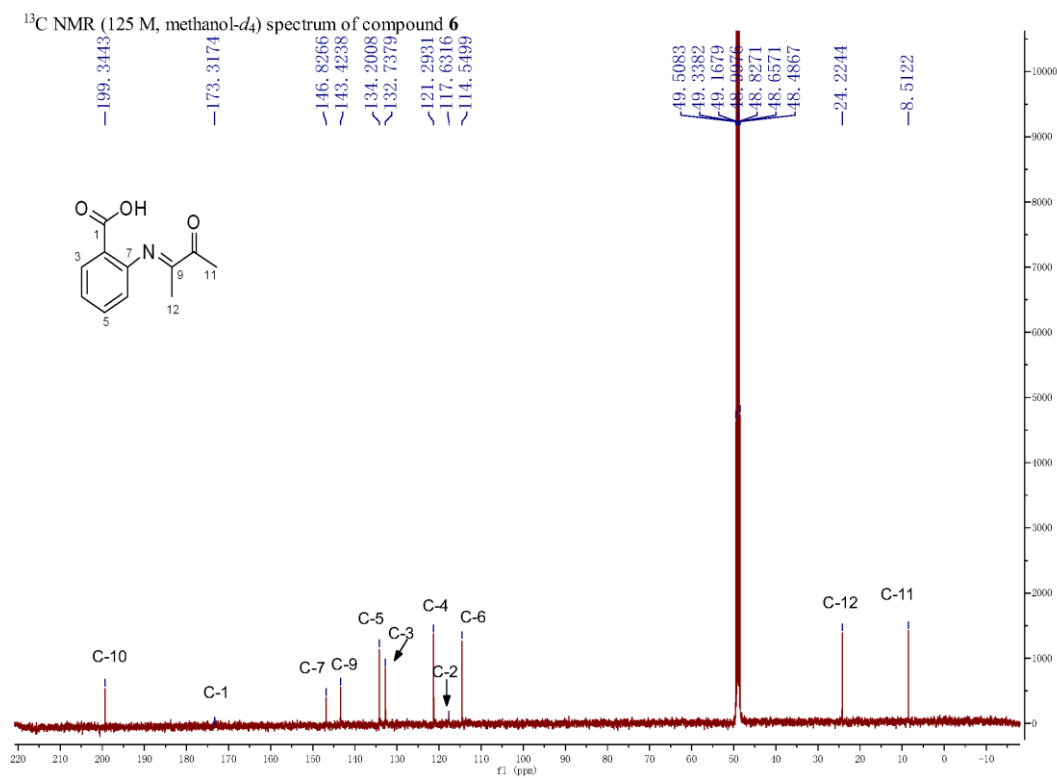

**Figure S31.**  $^1\text{H}$ – $^1\text{H}$  COSY spectrum of compound 6.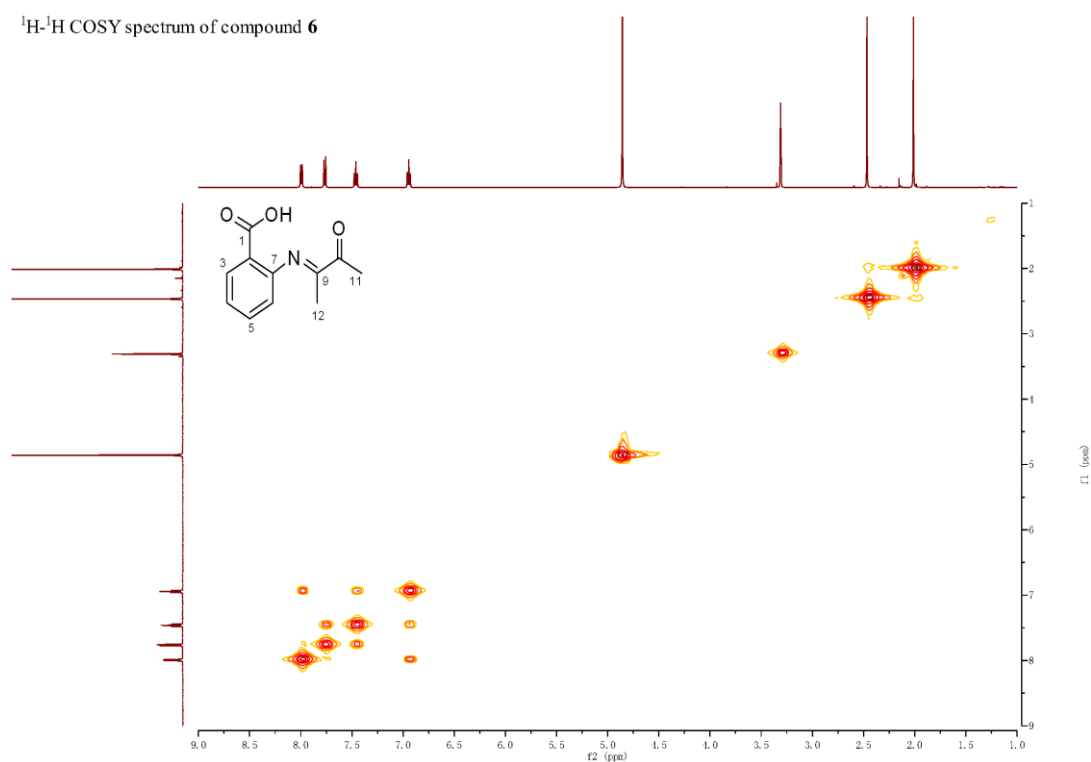**Figure S32.** HSQC spectrum of compound 6.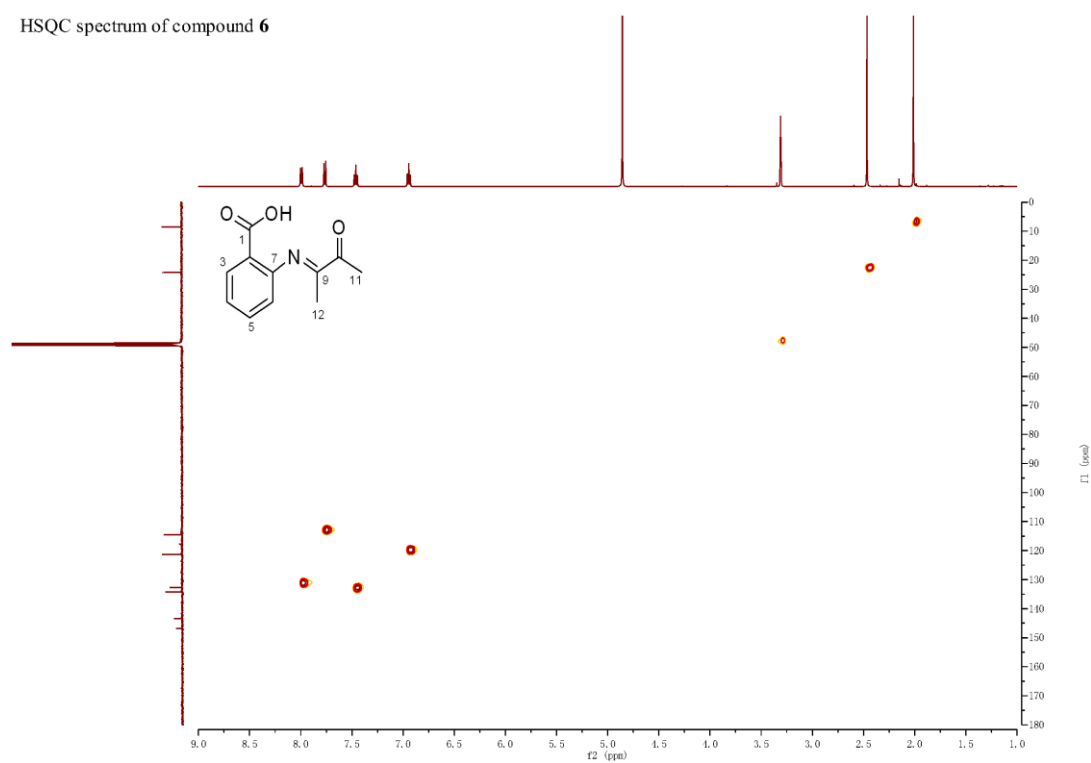

**Figure S33.** HMBC spectrum of compound **6**.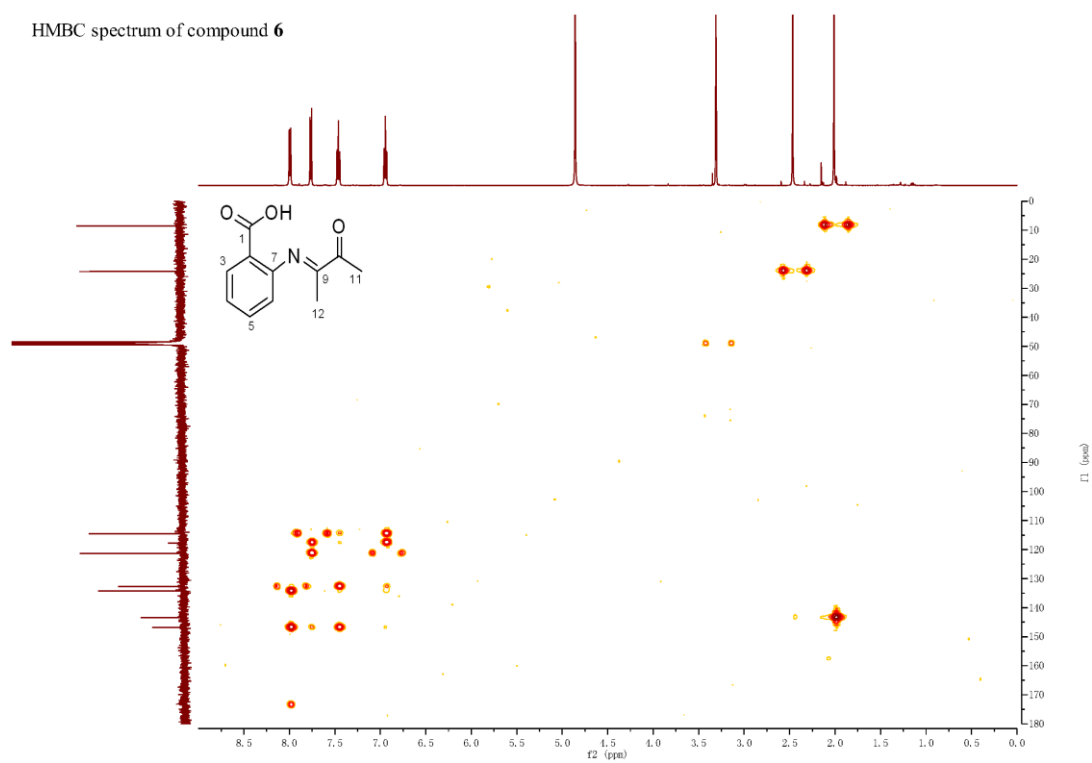

Supplement: Supplementary File 1 — Supplementary Materials (PDF, 1906 KB) [file marinedrugs-11-03068-s001.pdf]
