# Supplementary material for: Cytotoxic Anthranilic Acid Derivatives from Deep Sea Sediment-Derived Fungus Penicillium paneum SD-44
Source: MDPI journal article supplement (doi:10.3390/md11083068), 2013-08-21
Supplement: s2 [file s2]

marinedrugs-11-03068-s001.mol
  corina  04141405083D 1   1.00000     0.00000 
CORINA 3.49 0023  12.04.2013
 18 18  0  0  0  0  0  0  0  0999 V2000
    0.0659    1.1036    0.6783 C   0  0  0  0  0  0  0  0  0  0  0  0
   -0.1580    0.0966   -0.2347 C   0  0  0  0  0  0  0  0  0  0  0  0
    0.8392   -0.2797   -1.1208 C   0  0  0  0  0  0  0  0  0  0  0  0
    2.0670    0.3496   -1.0994 C   0  0  0  0  0  0  0  0  0  0  0  0
    2.3116    1.3675   -0.1865 C   0  0  0  0  0  0  0  0  0  0  0  0
    1.3042    1.7508    0.7126 C   0  0  0  0  0  0  0  0  0  0  0  0
    3.5488    2.0030   -0.1628 N   0  0  0  0  0  0  0  0  0  0  0  0
    0.6042    3.1492    2.5907 O   0  0  0  0  0  0  0  0  0  0  0  0
    1.5502    2.8294    1.6858 C   0  0  0  0  0  0  0  0  0  0  0  0
    6.0337    1.9630   -0.3784 C   0  0  0  0  0  0  0  0  0  0  0  0
    4.7010    1.2665   -0.2797 C   0  0  0  0  0  0  0  0  0  0  0  0
    5.8776   -0.8136   -0.3146 C   0  0  0  0  0  0  0  0  0  0  0  0
    4.6430   -0.0250   -0.3051 N   0  0  0  0  0  0  0  0  0  0  0  0
    5.8578   -0.6888    2.1807 C   0  0  0  0  0  0  0  0  0  0  0  0
    5.9730   -1.6271    0.9777 C   0  0  0  0  0  0  0  0  0  0  0  0
    2.6062    3.4305    1.6725 O   0  0  0  0  0  0  0  0  0  0  0  0
    4.9130   -2.5846    1.0172 O   0  0  0  0  0  0  0  0  0  0  0  0
    7.3187   -2.3537    1.0247 C   0  0  0  0  0  0  0  0  0  0  0  0
  1  2  2  0      
  2  3  1  0      
  3  4  2  0      
  4  5  1  0      
  5  6  2  0      
  6  1  1  0      
  5  7  1  0      
  8  9  1  0      
  9  6  1  0      
 10 11  1  0      
 11  7  1  0      
 12 13  1  0      
 13 11  2  0      
 14 15  1  0      
 15 12  1  0      
  9 16  2  0      
 15 17  1  0      
 15 18  1  0      
M  END
$$$$
