# Supplementary material for: Cytotoxic Anthranilic Acid Derivatives from Deep Sea Sediment-Derived Fungus Penicillium paneum SD-44
Source: MDPI journal article supplement (doi:10.3390/md11083068), 2013-08-21
Supplement: s4 [file s4]

marinedrugs-11-03068-s002.mol
  corina  04141405083D 1   1.00000     0.00000 
CORINA 3.49 0023  12.04.2013
 16 16  0  0  0  0  0  0  0  0999 V2000
   -0.0775    1.2489    0.1983 C   0  0  0  0  0  0  0  0  0  0  0  0
   -0.0492   -0.0630   -0.2218 C   0  0  0  0  0  0  0  0  0  0  0  0
    1.1499   -0.6570   -0.5818 C   0  0  0  0  0  0  0  0  0  0  0  0
    2.3290    0.0579   -0.5242 C   0  0  0  0  0  0  0  0  0  0  0  0
    2.3205    1.3813   -0.1033 C   0  0  0  0  0  0  0  0  0  0  0  0
    1.1079    1.9861    0.2620 C   0  0  0  0  0  0  0  0  0  0  0  0
    3.5084    2.1041   -0.0441 N   0  0  0  0  0  0  0  0  0  0  0  0
   -0.0694    3.9446    1.1295 O   0  0  0  0  0  0  0  0  0  0  0  0
    1.0849    3.3900    0.7100 C   0  0  0  0  0  0  0  0  0  0  0  0
    5.9424    2.2657    0.4159 C   0  0  0  0  0  0  0  0  0  0  0  0
    4.6289    1.5285    0.4634 C   0  0  0  0  0  0  0  0  0  0  0  0
    5.6457   -0.1872    1.6106 C   0  0  0  0  0  0  0  0  0  0  0  0
    4.5679    0.3311    0.9946 N   0  0  0  0  0  0  0  0  0  0  0  0
    5.9813    0.2313    2.8481 O   0  0  0  0  0  0  0  0  0  0  0  0
    2.1068    4.0474    0.7011 O   0  0  0  0  0  0  0  0  0  0  0  0
    6.3176   -1.0332    1.0516 O   0  0  0  0  0  0  0  0  0  0  0  0
  1  2  2  0      
  2  3  1  0      
  3  4  2  0      
  4  5  1  0      
  5  6  2  0      
  6  1  1  0      
  5  7  1  0      
  8  9  1  0      
  9  6  1  0      
 10 11  1  0      
 11  7  1  0      
 12 13  1  0      
 13 11  2  0      
 14 12  1  0      
  9 15  2  0      
 12 16  2  0      
M  END
$$$$
