# Supplementary material for: Cytotoxic Anthranilic Acid Derivatives from Deep Sea Sediment-Derived Fungus Penicillium paneum SD-44
Source: MDPI journal article supplement (doi:10.3390/md11083068), 2013-08-21
Supplement: s5 [file s5]

marinedrugs-11-03068-s002.mol
  ChemDraw12271312062D

 16 16  0  0  0  0  0  0  0  0999 V2000
   -2.5006   -0.2062    0.0000 C   0  0  0  0  0  0  0  0  0  0  0  0
   -2.5006   -1.0313    0.0000 C   0  0  0  0  0  0  0  0  0  0  0  0
   -1.7862   -1.4438    0.0000 C   0  0  0  0  0  0  0  0  0  0  0  0
   -1.0717   -1.0313    0.0000 C   0  0  0  0  0  0  0  0  0  0  0  0
   -1.0717   -0.2062    0.0000 C   0  0  0  0  0  0  0  0  0  0  0  0
   -1.7862    0.2062    0.0000 C   0  0  0  0  0  0  0  0  0  0  0  0
   -0.3572    0.2062    0.0000 N   0  0  0  0  0  0  0  0  0  0  0  0
   -1.0717    1.4438    0.0000 O   0  0  0  0  0  0  0  0  0  0  0  0
   -1.7862    1.0313    0.0000 C   0  0  0  0  0  0  0  0  0  0  0  0
    0.3572   -1.0312    0.0000 C   0  0  0  0  0  0  0  0  0  0  0  0
    0.3572   -0.2062    0.0000 C   0  0  0  0  0  0  0  0  0  0  0  0
    1.7862   -0.2062    0.0000 C   0  0  0  0  0  0  0  0  0  0  0  0
    1.0717    0.2062    0.0000 N   0  0  0  0  0  0  0  0  0  0  0  0
    2.5006    0.2062    0.0000 O   0  0  0  0  0  0  0  0  0  0  0  0
   -2.5006    1.4438    0.0000 O   0  0  0  0  0  0  0  0  0  0  0  0
    1.7862   -1.0313    0.0000 O   0  0  0  0  0  0  0  0  0  0  0  0
  1  2  2  0      
  2  3  1  0      
  3  4  2  0      
  4  5  1  0      
  5  6  2  0      
  6  1  1  0      
  5  7  1  0      
  8  9  1  0      
  9  6  1  0      
 10 11  1  0      
 11  7  1  0      
 12 13  1  0      
 13 11  2  0      
 14 12  1  0      
  9 15  2  0      
 12 16  2  0      
M  END
