# Supplementary material for: Cytotoxic Anthranilic Acid Derivatives from Deep Sea Sediment-Derived Fungus Penicillium paneum SD-44
Source: MDPI journal article supplement (doi:10.3390/md11083068), 2013-08-21
Supplement: s6 [file s6]

marinedrugs-11-03068-s003.mol
  corina  04141405083D 1   1.00000     0.00000 
CORINA 3.49 0023  12.04.2013
 17 18  0  0  0  0  0  0  0  0999 V2000
   -0.0311    1.2272   -0.1565 C   0  0  0  0  0  0  0  0  0  0  0  0
   -0.0888   -0.0799   -0.5873 C   0  0  0  0  0  0  0  0  0  0  0  0
    1.0750   -0.7705   -0.8876 C   0  0  0  0  0  0  0  0  0  0  0  0
    2.3043   -0.1575   -0.7588 C   0  0  0  0  0  0  0  0  0  0  0  0
    2.3831    1.1604   -0.3262 C   0  0  0  0  0  0  0  0  0  0  0  0
    1.2064    1.8627   -0.0212 C   0  0  0  0  0  0  0  0  0  0  0  0
    3.6207    1.7801   -0.1951 N   0  0  0  0  0  0  0  0  0  0  0  0
    0.1496    3.9083    0.7982 O   0  0  0  0  0  0  0  0  0  0  0  0
    1.2754    3.2609    0.4382 C   0  0  0  0  0  0  0  0  0  0  0  0
    4.4909   -0.0939    0.8531 N   0  0  0  0  0  0  0  0  0  0  0  0
    4.6744    1.0975    0.3567 C   0  0  0  0  0  0  0  0  0  0  0  0
    2.3476    3.8304    0.4924 O   0  0  0  0  0  0  0  0  0  0  0  0
    5.5390   -0.7729    1.4020 C   0  0  0  0  0  0  0  0  0  0  0  0
    6.7723   -0.8849    0.8731 O   0  0  0  0  0  0  0  0  0  0  0  0
    7.5436   -1.6250    1.6898 C   0  0  0  0  0  0  0  0  0  0  0  0
    6.8103   -1.9974    2.7561 C   0  0  0  0  0  0  0  0  0  0  0  0
    5.5220   -1.4507    2.5834 C   0  0  0  0  0  0  0  0  0  0  0  0
  1  2  2  0      
  2  3  1  0      
  3  4  2  0      
  4  5  1  0      
  5  6  2  0      
  6  1  1  0      
  5  7  1  0      
  8  9  1  0      
  9  6  1  0      
 10 11  2  0      
 11  7  1  0      
  9 12  2  0      
 10 13  1  0      
 13 14  1  0      
 14 15  1  0      
 15 16  2  0      
 16 17  1  0      
 17 13  2  0      
M  END
$$$$
