# Supplementary material for: Cytotoxic Anthranilic Acid Derivatives from Deep Sea Sediment-Derived Fungus Penicillium paneum SD-44
Source: MDPI journal article supplement (doi:10.3390/md11083068), 2013-08-21
Supplement: s7 [file s7]

marinedrugs-11-03068-s003.mol
  ChemDraw12271312062D

 17 18  0  0  0  0  0  0  0  0999 V2000
   -2.4390    0.2898    0.0000 C   0  0  0  0  0  0  0  0  0  0  0  0
   -2.4390   -0.5352    0.0000 C   0  0  0  0  0  0  0  0  0  0  0  0
   -1.7246   -0.9477    0.0000 C   0  0  0  0  0  0  0  0  0  0  0  0
   -1.0101   -0.5352    0.0000 C   0  0  0  0  0  0  0  0  0  0  0  0
   -1.0101    0.2898    0.0000 C   0  0  0  0  0  0  0  0  0  0  0  0
   -1.7246    0.7023    0.0000 C   0  0  0  0  0  0  0  0  0  0  0  0
   -0.2956    0.7023    0.0000 N   0  0  0  0  0  0  0  0  0  0  0  0
   -1.0101    1.9398    0.0000 O   0  0  0  0  0  0  0  0  0  0  0  0
   -1.7246    1.5273    0.0000 C   0  0  0  0  0  0  0  0  0  0  0  0
    0.4189   -0.5352    0.0000 N   0  0  0  0  0  0  0  0  0  0  0  0
    0.4189    0.2898    0.0000 C   0  0  0  0  0  0  0  0  0  0  0  0
   -2.4390    1.9398    0.0000 O   0  0  0  0  0  0  0  0  0  0  0  0
    1.1333   -0.9477    0.0000 C   0  0  0  0  0  0  0  0  0  0  0  0
    1.2196   -1.7682    0.0000 O   0  0  0  0  0  0  0  0  0  0  0  0
    2.0265   -1.9398    0.0000 C   0  0  0  0  0  0  0  0  0  0  0  0
    2.4390   -1.2253    0.0000 C   0  0  0  0  0  0  0  0  0  0  0  0
    1.8870   -0.6122    0.0000 C   0  0  0  0  0  0  0  0  0  0  0  0
  1  2  2  0      
  2  3  1  0      
  3  4  2  0      
  4  5  1  0      
  5  6  2  0      
  6  1  1  0      
  5  7  1  0      
  8  9  1  0      
  9  6  1  0      
 10 11  2  0      
 11  7  1  0      
  9 12  2  0      
 10 13  1  0      
 13 14  1  0      
 14 15  1  0      
 15 16  2  0      
 16 17  1  0      
 17 13  2  0      
M  END
