# Supplementary material for: Cytotoxic Anthranilic Acid Derivatives from Deep Sea Sediment-Derived Fungus Penicillium paneum SD-44
Source: MDPI journal article supplement (doi:10.3390/md11083068), 2013-08-21
Supplement: s8 [file s8]

marinedrugs-11-03068-s004.mol
  corina  04141405083D 1   1.00000     0.00000 
CORINA 3.49 0023  12.04.2013
 15 15  0  0  0  0  0  0  0  0999 V2000
    0.0132    1.1673   -0.2322 C   0  0  0  0  0  0  0  0  0  0  0  0
    0.1339   -0.2058   -0.1378 C   0  0  0  0  0  0  0  0  0  0  0  0
    1.3794   -0.7938    0.0110 C   0  0  0  0  0  0  0  0  0  0  0  0
    2.5180   -0.0166    0.0673 C   0  0  0  0  0  0  0  0  0  0  0  0
    2.4189    1.3745   -0.0267 C   0  0  0  0  0  0  0  0  0  0  0  0
    1.1489    1.9723   -0.1784 C   0  0  0  0  0  0  0  0  0  0  0  0
    3.5376    2.1467    0.0285 N   0  0  0  0  0  0  0  0  0  0  0  0
   -0.1890    4.0050   -0.4243 O   0  0  0  0  0  0  0  0  0  0  0  0
    1.0254    3.4396   -0.2797 C   0  0  0  0  0  0  0  0  0  0  0  0
    4.0844    1.0361    2.1264 C   0  0  0  0  0  0  0  0  0  0  0  0
    4.3954    1.9829    0.9960 C   0  0  0  0  0  0  0  0  0  0  0  0
    5.9755    3.6677   -0.1459 C   0  0  0  0  0  0  0  0  0  0  0  0
    5.6646    2.7209    0.9845 C   0  0  0  0  0  0  0  0  0  0  0  0
    2.0186    4.1374   -0.2326 O   0  0  0  0  0  0  0  0  0  0  0  0
    6.4627    2.5685    1.8847 O   0  0  0  0  0  0  0  0  0  0  0  0
  1  2  2  0      
  2  3  1  0      
  3  4  2  0      
  4  5  1  0      
  5  6  2  0      
  6  1  1  0      
  5  7  1  0      
  8  9  1  0      
  9  6  1  0      
 10 11  1  0      
 11  7  2  0      
 12 13  1  0      
 13 11  1  0      
  9 14  2  0      
 13 15  2  0      
M  END
$$$$
