# Supplementary material for: Cytotoxic Anthranilic Acid Derivatives from Deep Sea Sediment-Derived Fungus Penicillium paneum SD-44
Source: MDPI journal article supplement (doi:10.3390/md11083068), 2013-08-21
Supplement: s9 [file s9]

marinedrugs-11-03068-s004.mol
  ChemDraw12271312072D

 15 15  0  0  0  0  0  0  0  0999 V2000
   -2.1434   -0.2062    0.0000 C   0  0  0  0  0  0  0  0  0  0  0  0
   -2.1434   -1.0313    0.0000 C   0  0  0  0  0  0  0  0  0  0  0  0
   -1.4289   -1.4438    0.0000 C   0  0  0  0  0  0  0  0  0  0  0  0
   -0.7145   -1.0313    0.0000 C   0  0  0  0  0  0  0  0  0  0  0  0
   -0.7145   -0.2062    0.0000 C   0  0  0  0  0  0  0  0  0  0  0  0
   -1.4289    0.2062    0.0000 C   0  0  0  0  0  0  0  0  0  0  0  0
    0.0000    0.2062    0.0000 N   0  0  0  0  0  0  0  0  0  0  0  0
   -0.7145    1.4438    0.0000 O   0  0  0  0  0  0  0  0  0  0  0  0
   -1.4289    1.0313    0.0000 C   0  0  0  0  0  0  0  0  0  0  0  0
    0.7145   -1.0312    0.0000 C   0  0  0  0  0  0  0  0  0  0  0  0
    0.7145   -0.2062    0.0000 C   0  0  0  0  0  0  0  0  0  0  0  0
    2.1434   -0.2062    0.0000 C   0  0  0  0  0  0  0  0  0  0  0  0
    1.4289    0.2062    0.0000 C   0  0  0  0  0  0  0  0  0  0  0  0
   -2.1434    1.4438    0.0000 O   0  0  0  0  0  0  0  0  0  0  0  0
    1.4289    1.0313    0.0000 O   0  0  0  0  0  0  0  0  0  0  0  0
  1  2  2  0      
  2  3  1  0      
  3  4  2  0      
  4  5  1  0      
  5  6  2  0      
  6  1  1  0      
  5  7  1  0      
  8  9  1  0      
  9  6  1  0      
 10 11  1  0      
 11  7  2  0      
 12 13  1  0      
 13 11  1  0      
  9 14  2  0      
 13 15  2  0      
M  END
